# Supplementary material for: Mitigating magnetic frustration to improve single-crystalline nonstoichiometric Li1.06Ni0.90Mn0.04O2 for lithium-ion batteries
Source: Royal Society of Chemistry journal article supplement (doi:10.1039/d4ta03933e), 2024-01-01
Supplement: d4ta03933e1.pdf [file d4ta03933e1.pdf]

## Supporting Information

### Mitigating Magnetic Frustration to Improve Single-Crystalline Nonstoichiometric $\text{Li}_{1.06}\text{Ni}_{0.90}\text{Mn}_{0.04}\text{O}_2$ for Lithium-Ion Batteries

Guoyu Ding<sup>a†</sup>, Shizhou Wang<sup>a†</sup>, Xinhui Huang<sup>a</sup>, Qiancheng Zhao<sup>a</sup>, Yiyang Peng<sup>a</sup>, Zhonghan Wu<sup>a</sup>, Na Jiang<sup>a</sup>, Kuiming Liu<sup>a</sup>, Yudong Zhang<sup>a</sup>, Zhichen Hou<sup>a</sup>, Wutong Yang<sup>a</sup>, Meng Yu<sup>a,b</sup>, Fangming Liu<sup>a,\*</sup>, Fangyi Cheng<sup>a,b,c,\*</sup>

*a. Key Laboratory of Advanced Energy Materials Chemistry (Ministry of Education), Engineering Research Center of High-efficiency Energy Storage (Ministry of Education), College of Chemistry, Nankai University, Tianjin 300071, China.*

*b. State Key Laboratory of Advanced Chemical Power Sources, Nankai University, Tianjin 300071, China.*

*c. Haihe Laboratory of Sustainable Chemical Transformations, Tianjin 300192, China.*

*† These authors contributed equally to this work.*

*\* Corresponding authors.*

*E-mail: fmliu@nankai.edu.cn (F.L.); fycheng@nankai.edu.cn (F.C.)*

## Supplemental Figures

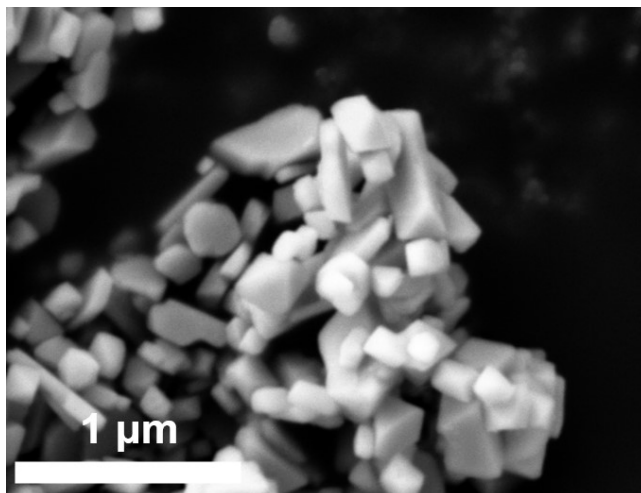

**Fig. S1.** SEM image of LP-NM particles.

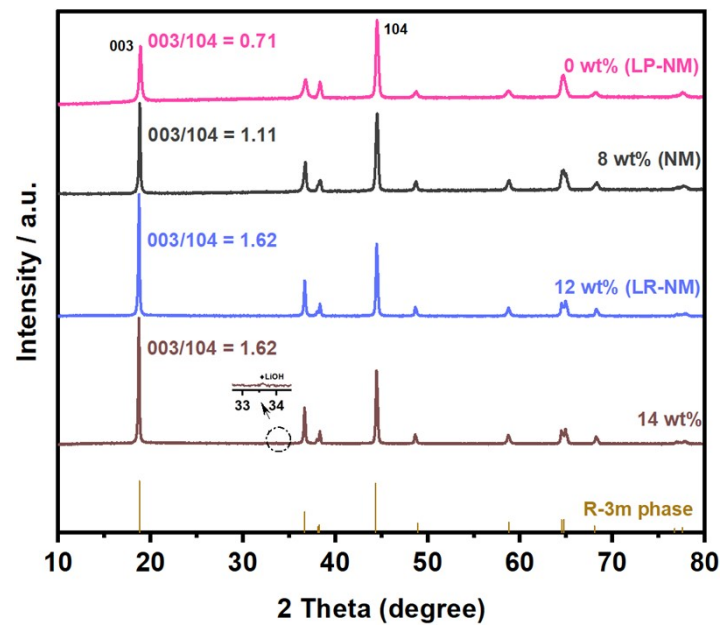

**Fig. S2.** The XRD patterns for the samples at different lithium supplement.

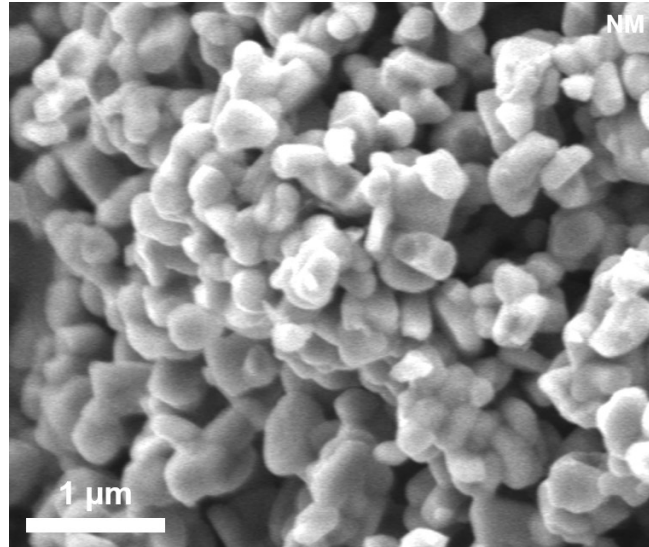

**Fig. S3.** SEM image of NM particles.

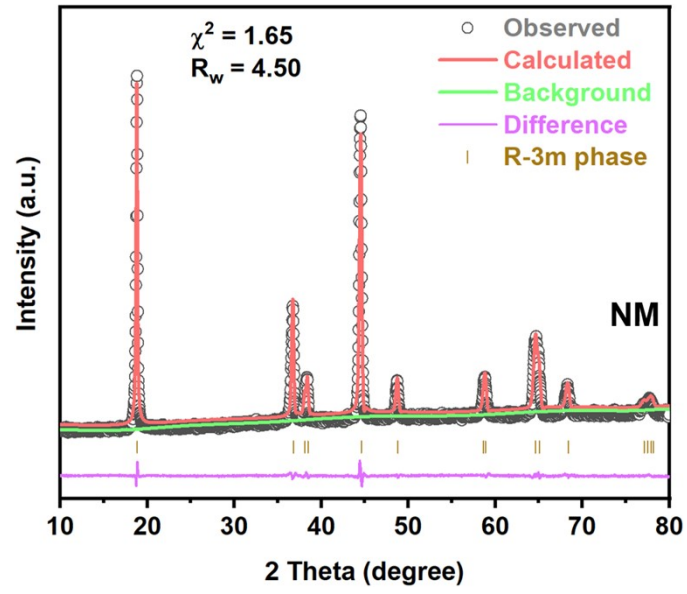

**Fig. S4.** Rietveld-refined XRD patterns of NM.

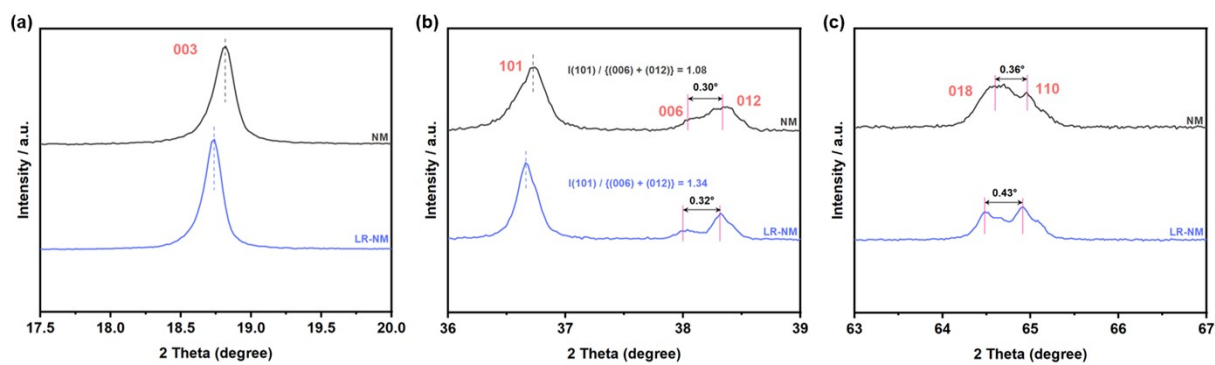

**Fig. S5.** XRD patterns of expanded view region of  $2\theta$  at (a) 17.5°–20.0°, (b) 36.0°–39.0°, and (c) 63.0°–67.0°.

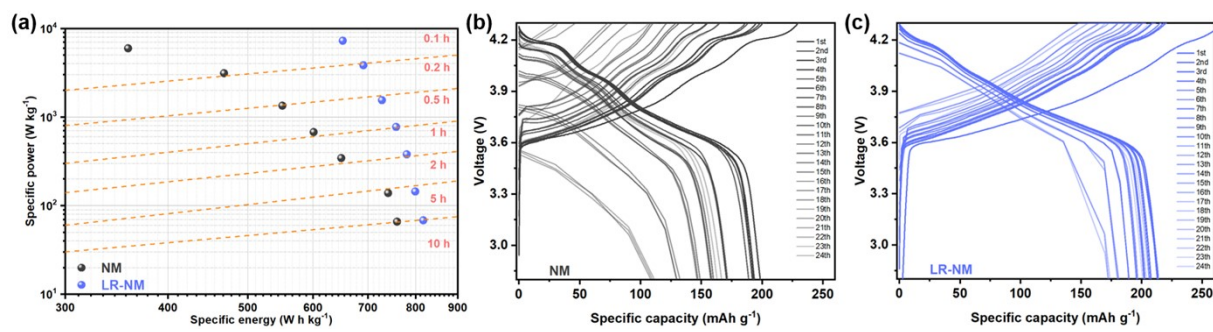

**Fig. S6.** Ragone diagram of NM and LR-NM (a). The charge discharge curves for the rate performance of NM (b) and LR-NM (c).

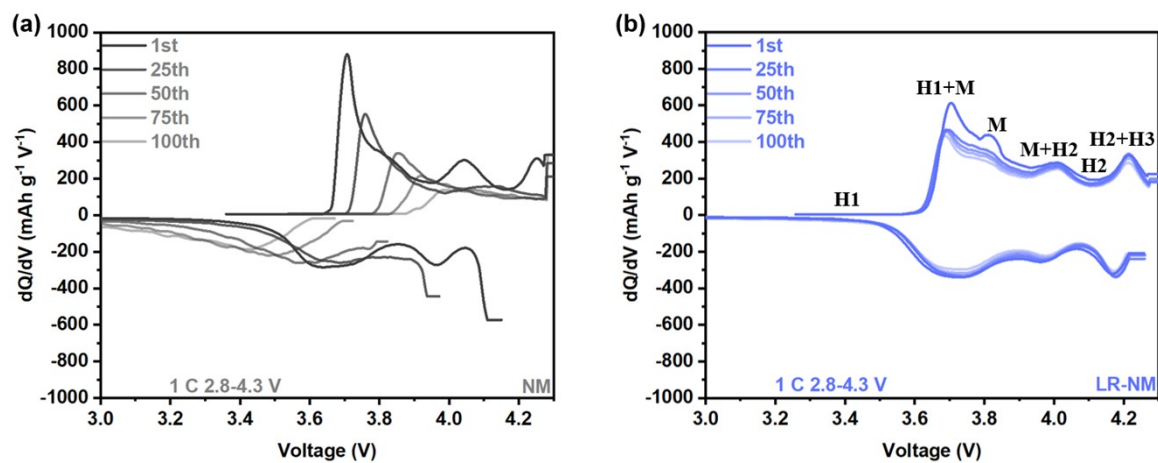

**Fig. S7.**  $dQ/dV^{-1}$  curves for (a) NM and (b) LR-NM at different cycles.



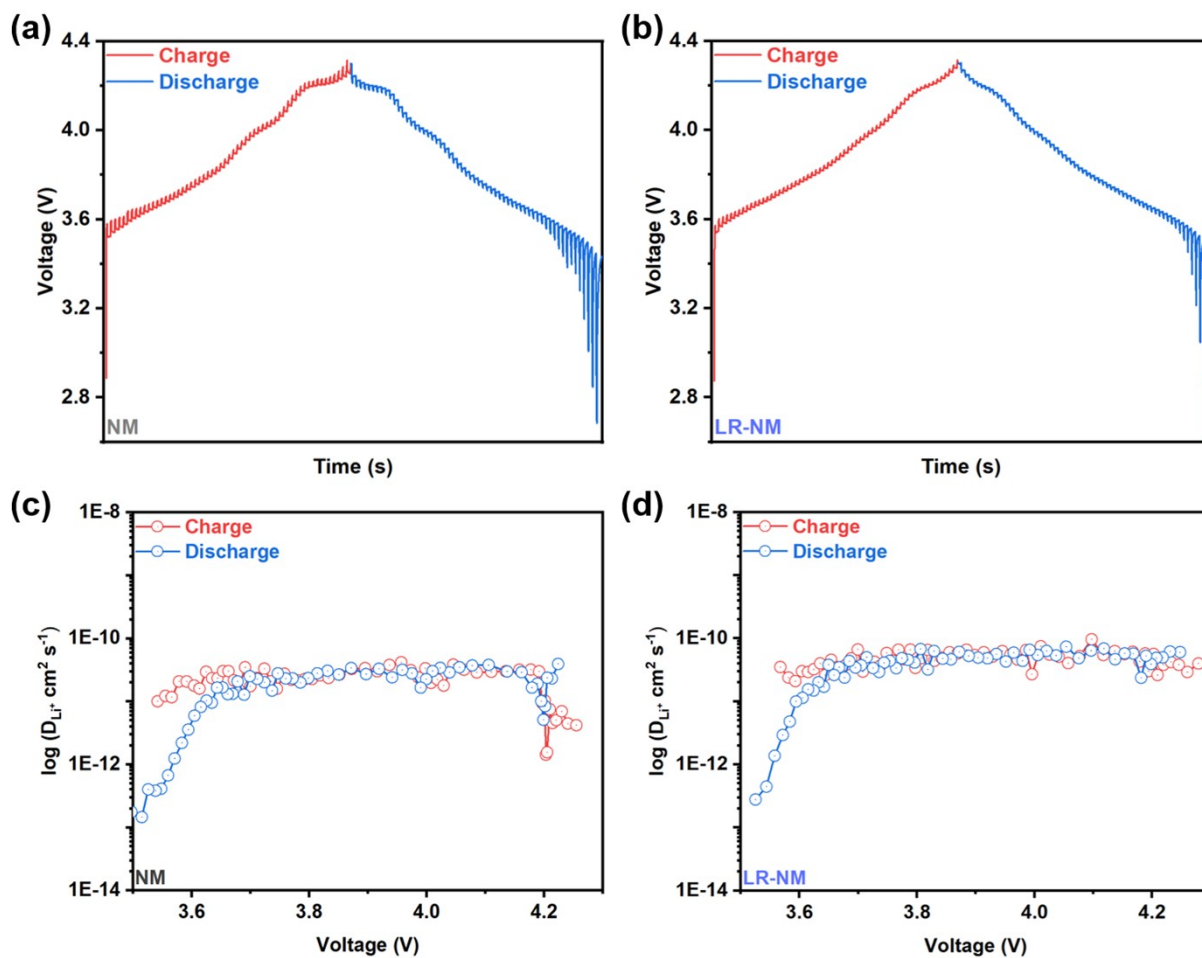

**Fig. S8.** GITT curves (a, b) and the calculated  $\text{Li}^+$  diffusion coefficient (c, d) of NM and LR-NM.

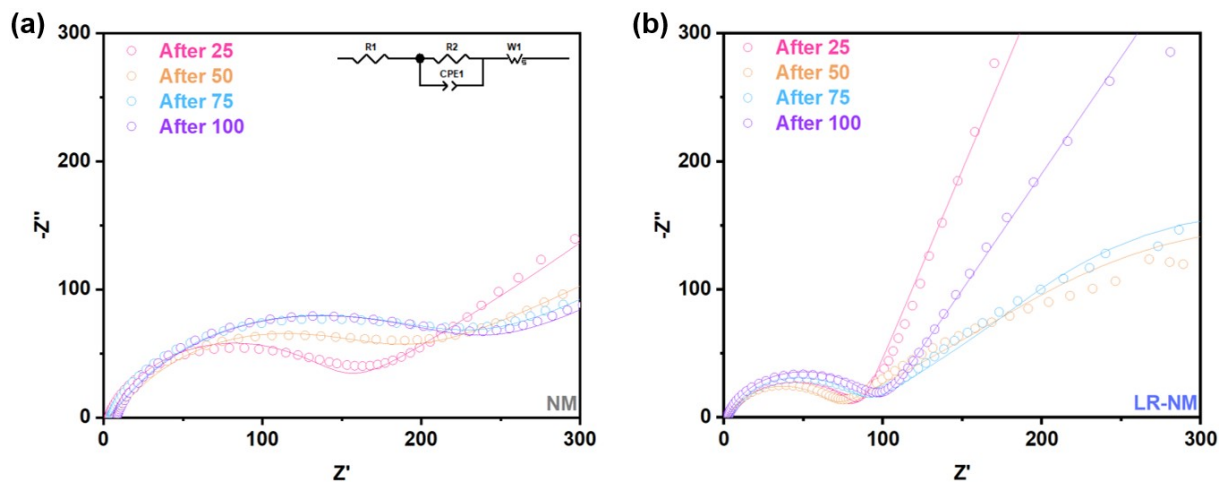

**Fig. S9.** Nyquist plots of different numbers of cycles at 1 C for (a) NM and (b) LR-NM in the voltage range of 2.8–4.3 V.

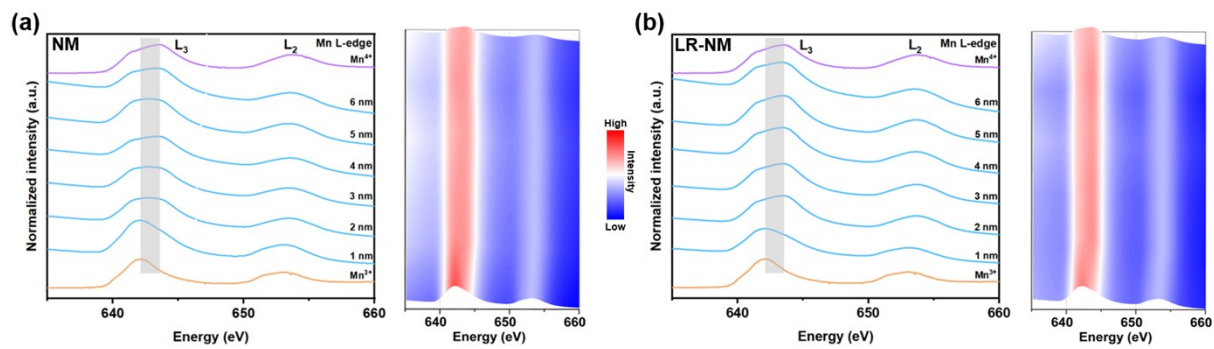

**Fig. S10.** Mn L-edge EELS spectra of the pristine NM (a) and LR-NM (b).

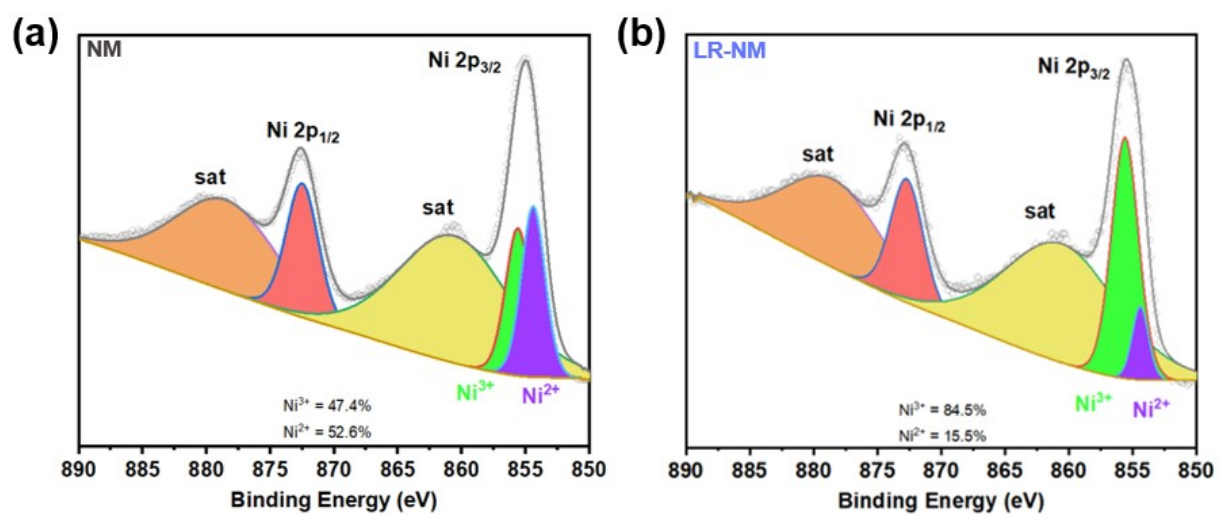

Fig. S11. XPS spectra of Ni 2p for NM (a) and LR-NM (b) cathodes.

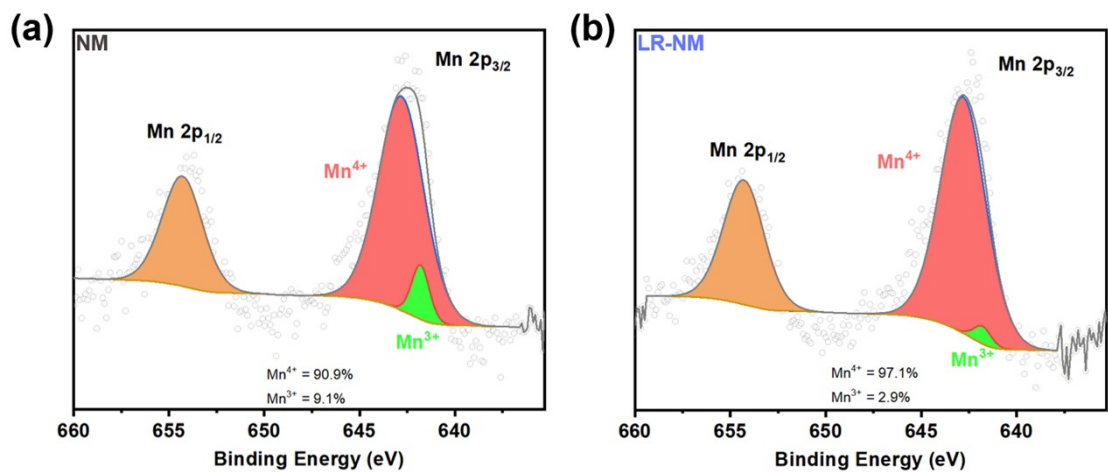

Fig. S12. XPS spectra of Mn 2p for NM (a) and LR-NM (b) cathodes.

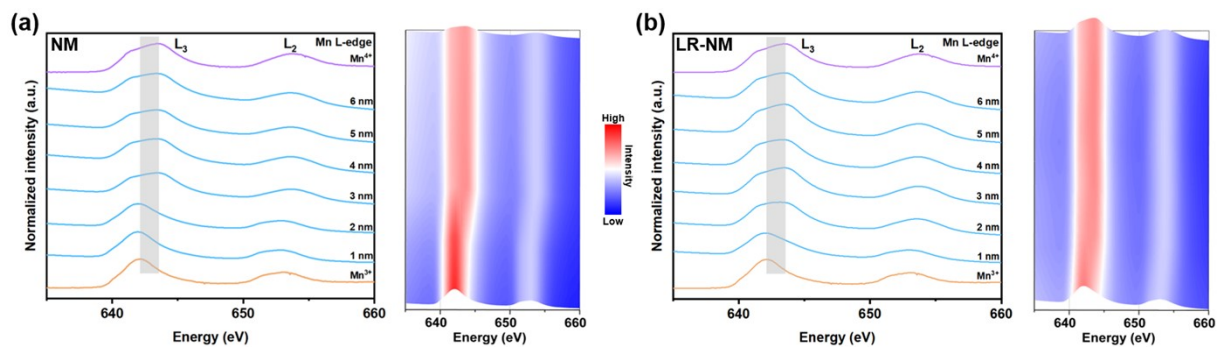

**Fig. S13.** Mn L-edge EELS spectra of the NM (a) and LR-NM (b) after 100 cycles.

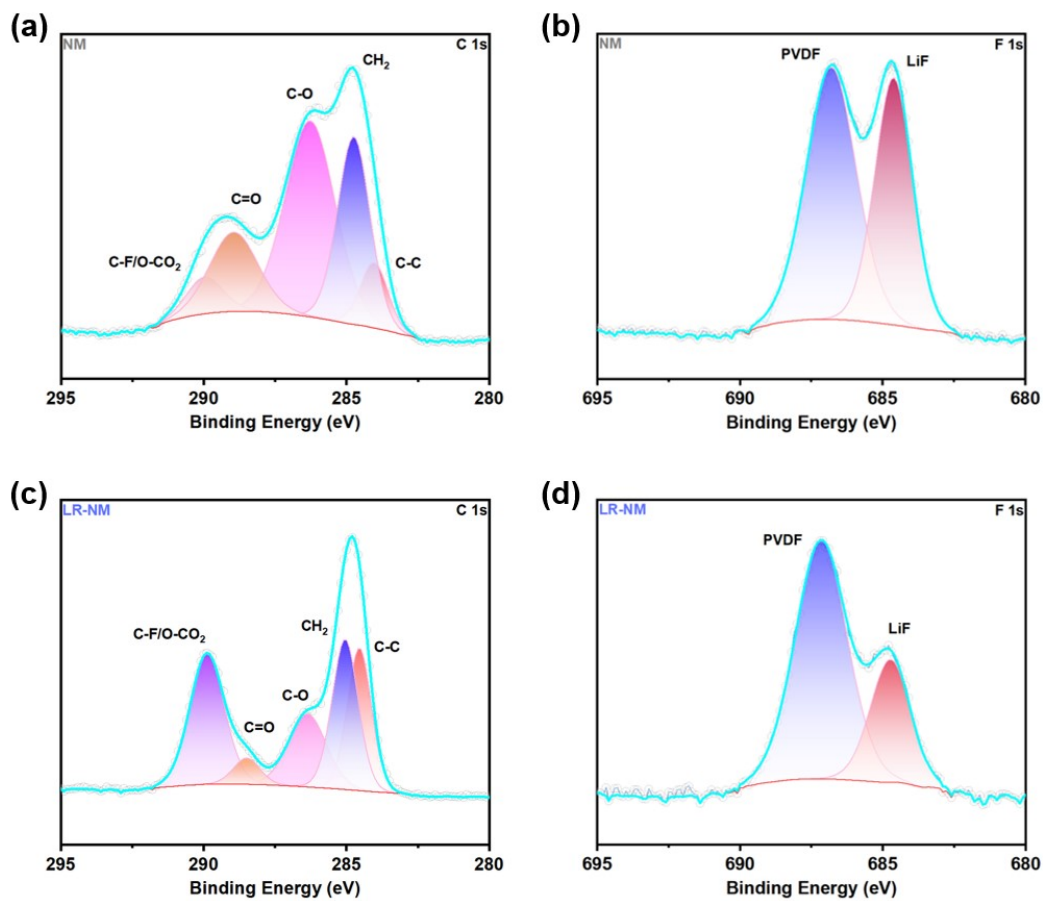

**Fig. S14.** C 1s, and F 1s XPS spectra for NM (a and b) and LR-NM (c and d) at 1 C rate after 100 cycles.

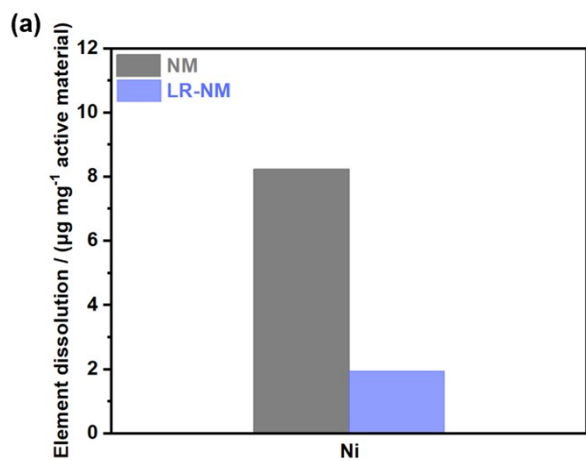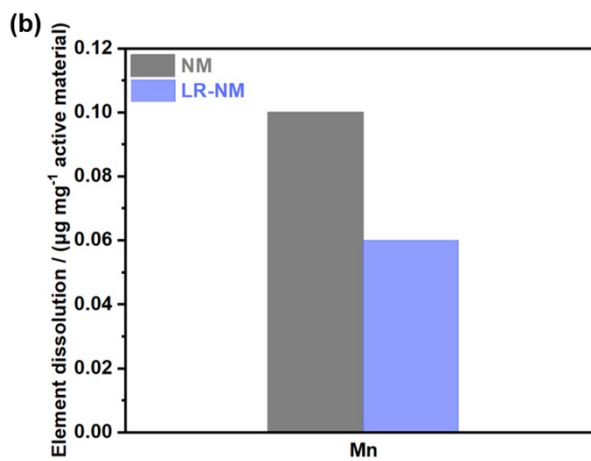

**Fig. S15.** Dissolution of (a) Ni and (b) Mn elements for NM and LR-NM from anode after 100 cycles.



**Table S1.** Elemental analysis of the samples using ICP-OES.

| Sample                                                    | Li (molar ratio) | Ni (molar ratio) | Mn (molar ratio) |
|-----------------------------------------------------------|------------------|------------------|------------------|
| $\text{Ni}_{0.95}\text{Mn}_{0.05}(\text{OH})_x$ precursor | /                | 0.95             | 0.05             |
| NM                                                        | 0.99             | 0.96             | 0.05             |
| LR-NM                                                     | 1.06             | 0.90             | 0.04             |

**Table S2.** Rietveld refinement data of XRD for NM and LR-NM.

| Sample | Lattice parameters |        |        | Ni in Li site (%) | Rw (%) | $\chi^2$ (%) |
|--------|--------------------|--------|--------|-------------------|--------|--------------|
|        | a (Å)              | c (Å)  | c/a    |                   |        |              |
| NM     | 2.867              | 14.165 | 4.9407 | 6.86              | 4.50   | 1.65         |
| LR-NM  | 2.869              | 14.177 | 4.9414 | 1.51              | 3.25   | 1.37         |

**Table S3.** The performance comparison and mechanistic discussion of reported nickel-rich oxide cathode materials.

| Composition                                                                | Initial discharge capacity (mAh g <sup>-1</sup> ) | Voltage range (V) | Cycle number | Capacity retention (%) | Ref.      |
|----------------------------------------------------------------------------|---------------------------------------------------|-------------------|--------------|------------------------|-----------|
| SC-Li <sub>1.06</sub> Ni <sub>0.90</sub> Mn <sub>0.04</sub> O <sub>2</sub> | 214.8 (0.1 C)                                     | 2.8-4.3           | 100          | 89.5 (1 C)             | This work |
| SC-LiNi <sub>0.95</sub> Mn <sub>0.05</sub> O <sub>2</sub>                  | 218.2 (0.1 C)                                     | 2.7-4.3           | 200          | 84.4 (1 C)             | 1         |
|                                                                            |                                                   |                   | 400          | 54.5 (5 C)             |           |
| PC-LiNi <sub>0.95</sub> Mn <sub>0.05</sub> O <sub>2</sub>                  | 217.2 (0.1 C)                                     | 2.75-4.3          | 100          | 89.9 (1 C)             | 2         |
| Co coated/doped                                                            | 221.2 (0.1 C)                                     | 3.0-4.3           | 100          | 83.2 (0.5 C)           | 3         |
| PC-LiNi <sub>0.95</sub> Mn <sub>0.05</sub> O <sub>2</sub>                  |                                                   |                   |              |                        |           |
| PPy coated                                                                 | 234.6 (0.05 C)                                    | 2.7-4.3           | 100          | 90.1                   | 4         |
| PC-LiNi <sub>0.95</sub> Mn <sub>0.05</sub> O <sub>2</sub>                  |                                                   |                   | 100          | 91.1                   |           |
| Al doped                                                                   | /                                                 | 2.7-4.3 V         | 180          | 89.4 (1 C)             | 5         |
| PC-LiNi <sub>0.90</sub> Mn <sub>0.10</sub> O <sub>2</sub>                  |                                                   |                   | 100          | 86.4 (5 C)             |           |
| Co, Al co-doped                                                            | /                                                 | 3.0-4.3           | 200          | 80.4 (1 C)             | 6         |
| PC-LiNi <sub>0.90</sub> Mn <sub>0.10</sub> O <sub>2</sub>                  |                                                   |                   | 200          | 76.8 (5 C)             |           |
| Co doped and La <sub>2</sub> O <sub>3</sub> coated                         | 214.7 (0.2 C)                                     | 2.7-4.3           | 200          | 77.9 (1 C)             | 7         |
|                                                                            |                                                   |                   | 200          | 75.7 (5 C)             |           |
| PC-LiNi <sub>0.90</sub> Mn <sub>0.10</sub> O <sub>2</sub>                  |                                                   |                   |              |                        |           |
| La doped and La <sub>2</sub> O <sub>3</sub> coated                         | 214.4 (0.2 C)                                     | 2.7-4.3           | 100          | 83.19 (1 C)            | 8         |
| PC-LiNi <sub>0.90</sub> Mn <sub>0.10</sub> O <sub>2</sub>                  |                                                   |                   |              |                        |           |

**Table S4.** The average charging/discharging Li<sup>+</sup> diffusion coefficient of NM and LR-NM electrodes.

---

| Sample                                        | NM                       | LR-NM                    |
|-----------------------------------------------|--------------------------|--------------------------|
| Charging / cm <sup>2</sup> s <sup>-1</sup>    | 2.21 × 10 <sup>-11</sup> | 4.74 × 10 <sup>-11</sup> |
| Discharging / cm <sup>2</sup> s <sup>-1</sup> | 1.91 × 10 <sup>-11</sup> | 4.08 × 10 <sup>-11</sup> |

---

**Table S5.** Impedance parameters fitted at various cycles for NM and LR-NM electrodes.

| Sample | 25th cycle        |                   | 50th cycle        |                   | 75th cycle        |                   | 100th cycle       |                   |
|--------|-------------------|-------------------|-------------------|-------------------|-------------------|-------------------|-------------------|-------------------|
|        | $R_{sf} (\Omega)$ | $R_{ct} (\Omega)$ |
| NM     | 3.5               | 130.2             | 3.0               | 135.1             | 2.1               | 182.9             | 3.1               | 193.7             |
| LR-NM  | 2.4               | 82.7              | 1.8               | 60.5              | 2.1               | 80.4              | 1.6               | 93.9              |

## Notes and references

1. L. Ni, R. Guo, S. Fang, J. Chen, J. Gao, Y. Mei, S. Zhang, W. Deng, G. Zou, H. Hou and X. Ji, *eScience*, 2022, **2**, 116-124.
2. Y. Wang, Y. Zhu and P. Gao, *Electrochim. Acta*, 2022, **427**, 140891.
3. J. Chen, B. Chu, G. Li, T. Huang and A. Yu, *Electrochem Commun*, 2023, **152**, 107514.
4. P. He, M. Zhang, S. Wang, L. Yuwen, Y. Wang, Y. Yan, D. Zhang and X. Sun, *Electrochim. Acta*, 2023, **470**, 143331.
5. H. Feng, Y. Leng, T. Chen, Y. Sun, C. Hai and Y. Zhou, *J. Alloy. Compd.*, 2023, **960**, 170676.
6. Z. Xiao, B. Zhang, X. He and X. Ou, *Chem. Commun.*, 2023, **59**, 7935-7938.
7. J.-Q. Peng, Y.-Y. Wei, D.-M. Liu, Y. Li, B. Hu, B. Huang, J.-W. Yang, S.-H. Xiao and R.-H. Wang, *Rare Met.*, 2023, **43**, 658-670.
8. J. Peng, Y. Wei, B. Hu, L. Zhang, J. Huang, H. Tang, B. Huang, Y. Li, S. Chen and S. Xiao, *Ionics*, 2023, **29**, 2549-2561.
